# Supplementary material for: A GFP-strategy for efficient recombinant protein overexpression and purification in Mycobacterium smegmatis
Source: Royal Society of Chemistry journal article supplement (doi:10.1039/c8ra06237d), 2018-01-01
Supplement: c8ra06237d1.pdf [file c8ra06237d1.pdf]

## Electronic Supplementary Information

### **A GFP-strategy for efficient recombinant protein overexpression and purification in *Mycobacterium smegmatis***

Anjana Radhakrishnan <sup>a</sup>, Christopher M Furze <sup>a</sup>, Mohd Syed Ahangar <sup>a</sup>, Elizabeth Fullam <sup>a\*</sup>

<sup>a</sup> School of Life Sciences, University of Warwick, Coventry, CV4 7AL, United Kingdom. E-mail: e.fullam@warwick.ac.uk; Tel: +44 (0)2476 574239

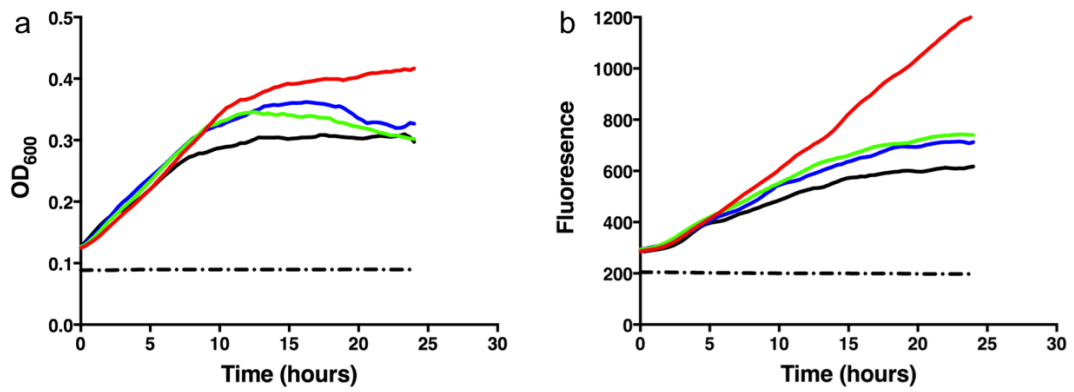

Fig. S1: Growth rates and green fluorescent protein fluorescence of NagA-GFP expressed in *M. smegmatis* mc<sup>2</sup>4517 strains. (a) Growth curve of *M. smegmatis* mc<sup>2</sup>4517. (b) GFP fluorescence of *M. smegmatis* mc<sup>2</sup>4517. Concentrations of acetamide induction: red - 0 %, green - 0.1%, blue - 0.2%, black - 0.4 %. The dashed black line represents a media only control.

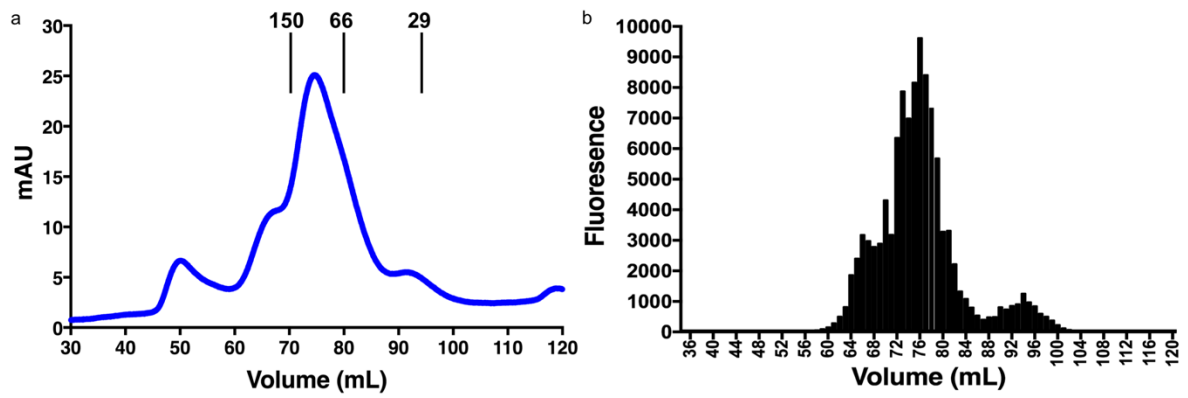

Fig S2: Size exclusion and GFP fluorescence of NagA-GFP-His<sub>6</sub>. (a) Size exclusion chromatography of purified NagA-GFP-His<sub>6</sub>. The sequence derived molecular weight of dimeric NagA-GFP-His<sub>6</sub> is 133 kDa. The elution was monitored by recording absorbance at 280 nm. (b) GFP fluorescence of the 1 mL fractions collected by size exclusion chromatography.

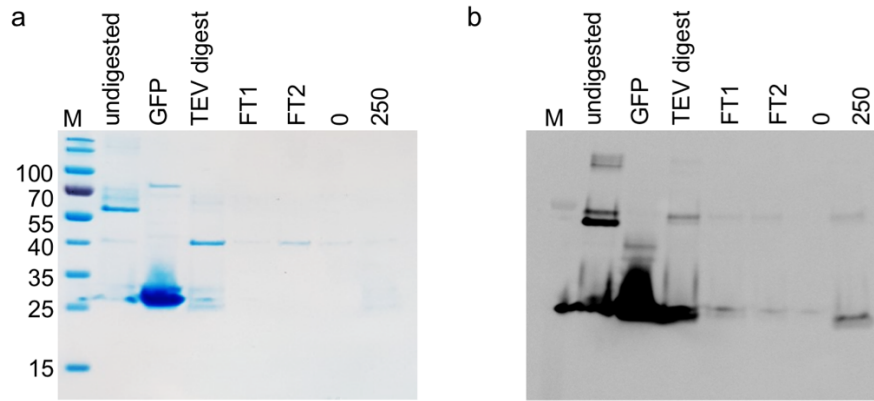

Fig S3: TEV-cleavage of NagA-GFP-His<sub>6</sub>. (a) SDS-PAGE analysis of the purification of NagA-GFP-His<sub>6</sub> digested with TEV protease (b) In-gel fluorescence of NagA-GFP-His<sub>6</sub> digested with TEV protease. M: molecular weight markers in kDa, undigested: NagA-GFP-His<sub>6</sub> after size-exclusion chromatography, GFP: GFP control protein, TEV digest: NagA-GFP-His<sub>6</sub> following digest with TEV-His<sub>6</sub>, FT1: flow through from column, FT2: flow through from column after reloading FT1 to the Ni<sup>2+</sup>-affinity column, 0: 0mM imidazole wash-step, 250: 250mM wash-step.

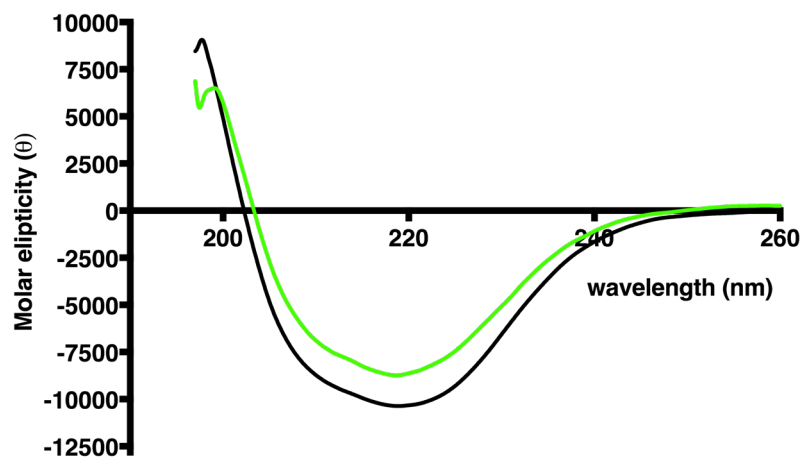

Fig S4: CD spectra of NagA-GFP-His<sub>6</sub> (green) and NagA after TEV-cleavage (black)
